# Supplementary material
Source: PubMed Central journal article supplement (PMC4330750)
Supplement: pnas.201416276SI.pdf [file pnas.201416276SI.pdf]

# Supporting Information

Seifert et al. 10.1073/pnas.1416276112

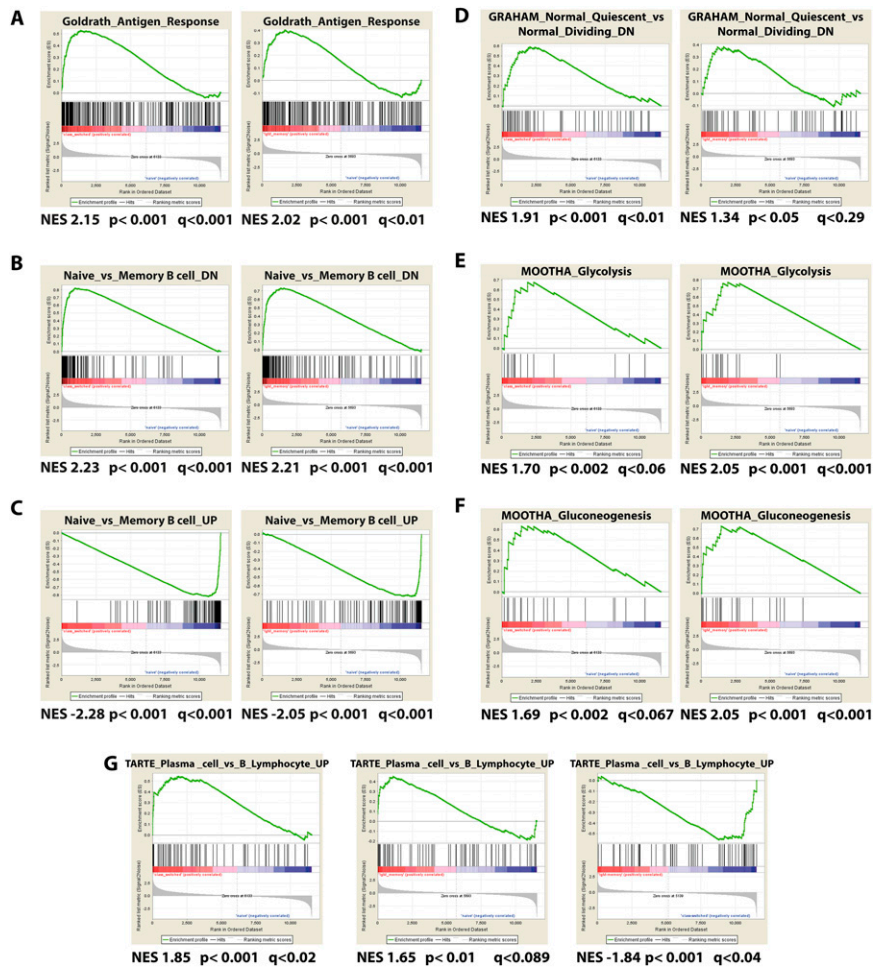

**Fig. S1.** GSEA of PB B-cell subsets reveals a memory B-cell phenotype of  $IgM^+IgD^+CD27^+$  B cells. (A–F) Selected plots from a GSEA based on 29,969 probe sets from gene expression profiling (GEP) of five  $IgG^+CD27^+$  (Left, red), five  $IgM^+IgD^+CD27^+$  (Right, red), and five naive (blue) B-cell samples, respectively. (G) PC-related gene sets are expressed at a higher level in  $IgG$  memory (red) vs.  $IgM^+IgD^+CD27^+$  (blue) B cells. The normalized enrichment score (NES), nominal  $P$  value ( $p$ ), and FDR ( $q$ ) are given for each plot.





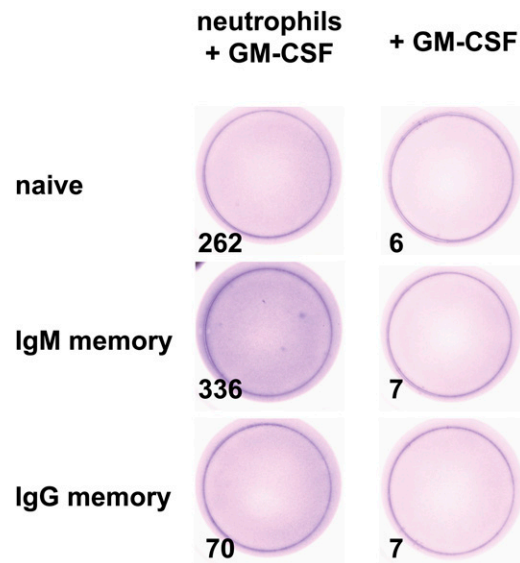

**Fig. S4.** Human neutrophil IFN- $\gamma$  secretion capacity. Representative ELISpot analysis out of two experiments with cocultures of sort-purified B-cell subsets and neutrophils, stimulated with 1 mg/L GM-CSF. Numbers in the lower left corners give the total number of spots counted by the ELISpot reader.







**Table S1. Two hundred fourteen annotated transcripts with at least twofold differential expression between IgM memory, IgG memory, and naive B cells**

| Probe set                        | IgM memory/naive | IgM memory/IgG memory | Gene symbol    |
|----------------------------------|------------------|-----------------------|----------------|
| <b>Cytoskeleton and ECM</b>      |                  |                       |                |
| 204834_at                        | 14.4             | 2.0                   | FGL2           |
| 212992_at                        | 2.8              | 2.9                   | AHNAK2         |
| 209191_at                        | 2.6              | 3.7                   | TUBB6          |
| 240777_at                        | 2.4              | 3.5                   | SYNE2          |
| 225613_at                        | 30.1             | 3.8                   | MAST4          |
| 216699_s_at                      | 7.3              | 3.5                   | KLK1           |
| 228673_s_at                      | 2.2              | 2.1                   | EML4           |
| 224374_s_at                      | 4.1              | 5.0                   | EMILIN2        |
| 229566_at                        | 3.1              | 4.7                   | LOC645638      |
| 203881_s_at                      | 2.3              | 3.3                   | DMD            |
| 212993_at                        | 3.8              | 2.6                   | BTBD14A        |
| 204964_s_at                      | 14.5             | -6.6                  | SSPN           |
| 202890_at                        | 2.4              | -16.7                 | MAP7           |
| 200696_s_at                      | 3.0              | -4.1                  | GSN            |
| 214602_at                        | 18.5             | -2.4                  | COL4A4         |
| 206167_s_at                      | 3.2              | -7.4                  | ARHGAP6        |
| 235670_at                        | 2.4              | -2.5                  | STX11          |
| 200974_at                        | 2.5              | -3.7                  | ACTA2          |
| 213638_at                        | -2.5             | 2.7                   | PHACTR1        |
| 212365_at                        | -5.3             | 3.2                   | MYO1B          |
| 201718_s_at                      | -5.6             | 4.3                   | EPB41L2        |
| 222234_s_at                      | -33.3            | 2.1                   | DBNDD1         |
| 219259_at                        | -10.8            | -2.6                  | SEMA4A         |
| 218330_s_at                      | -2.2             | -3.0                  | NAV2           |
| 225540_at                        | -3.9             | -2.5                  | MAP2           |
| 205268_s_at                      | -2.6             | -4.1                  | ADD2           |
| <b>Lymphocyte signaling</b>      |                  |                       |                |
| 227900_at                        | 2.1              | 2.7                   | CBLB           |
| 210313_at                        | 9.0              | 20.2                  | LILRA4         |
| 224192_at                        | 2.9              | 2.9                   | FCRL2          |
| 205789_at                        | 2.1              | 2.6                   | CD1D           |
| 205987_at                        | 7.3              | 4.9                   | CD1C           |
| 1553678_a_at                     | 13.5             | -4.2                  | ITGB1          |
| 204647_at                        | 7.2              | -9.7                  | HOMER3         |
| 1554519_at                       | 5.5              | -2.1                  | CD80           |
| 210031_at                        | 7.9              | -9.3                  | CD247          |
| 209583_s_at                      | -9.3             | 5.6                   | CD200          |
| 205790_at                        | -22.2            | 2.4                   | SKAP1          |
| 210644_s_at                      | -3.2             | 2.5                   | LAIR1          |
| 206759_at                        | -14.7            | 2.5                   | FCER2          |
| 215925_s_at                      | -2.1             | 6.6                   | CD72           |
| 210325_at                        | -14.1            | 13.5                  | CD1A           |
| 210972_x_at                      | -2.7             | -7.0                  | TRAC           |
| 212646_at                        | -35.7            | -22.4                 | RFTN1          |
| 205269_at                        | -2.3             | -10.8                 | LCP2           |
| 204891_s_at                      | -4.6             | -2.1                  | LCK            |
| 235310_at                        | -6.7             | -6.7                  | GCET2          |
| 205692_s_at                      | -10.3            | -5.3                  | CD38           |
| 1553995_a_at                     | -4.1             | -3.4                  | NT5E           |
| <b>Ca<sup>++</sup> signaling</b> |                  |                       |                |
| 209469_at                        | 5.8              | 5.1                   | GPM6A          |
| 218872_at                        | 17.4             | -2.8                  | TESC           |
| 225019_at                        | -2.0             | 3.3                   | CAMK2D         |
| 206637_at                        | -27.0            | -2.2                  | P2RY14         |
| 211323_s_at                      | -4.5             | -2.2                  | ITPR1          |
| 210786_s_at                      | -2.4             | -2.0                  | FLI1           |
| 211825_s_at                      | -3.1             | -2.1                  | EW5R1 /// FLI1 |
| <b>GTP signaling</b>             |                  |                       |                |
| 202975_s_at                      | 17.6             | 16.9                  | RHOBTB3        |
| 206290_s_at                      | 3.1              | 10.7                  | RGS7           |
| 204115_at                        | 9.3              | 10.0                  | GNG11          |



**Table S1. Cont.**

| Probe set                                                                  | IgM memory/naive | IgM memory/IgG memory | Gene symbol |
|----------------------------------------------------------------------------|------------------|-----------------------|-------------|
| 202748_at                                                                  | 2.4              | 2.1                   | GBP2        |
| 222942_s_at                                                                | 4.6              | -10.9                 | TIAM2       |
| 217762_s_at                                                                | 3.1              | -2.1                  | RAB31       |
| 209581_at                                                                  | 2.0              | -6.0                  | HRASLS3     |
| 218807_at                                                                  | -2.3             | 2.0                   | VAV3        |
| 203431_s_at                                                                | -23.6            | 2.2                   | RICS        |
| Insulin signaling                                                          |                  |                       |             |
| 209185_s_at                                                                | -2.3             | 2.5                   | IRS2        |
| 213792_s_at                                                                | -3.8             | -2.7                  | INSR        |
| MAPK signaling                                                             |                  |                       |             |
| 204068_at                                                                  | 4.4              | 3.5                   | STK3        |
| 208892_s_at                                                                | -4.4             | 6.8                   | DUSP6       |
| PI3K signaling                                                             |                  |                       |             |
| 219358_s_at                                                                | 2.0              | 2.6                   | CENTA2      |
| 210612_s_at                                                                | 2.4              | -2.0                  | SYNJ2       |
| 209504_s_at                                                                | 2.1              | -2.3                  | PLEKHB1     |
| 1558770_a_at                                                               | 2.1              | -3.1                  | PIK3R6      |
| 217677_at                                                                  | -2.5             | 2.2                   | PLEKHA2     |
| 219024_at                                                                  | -3.0             | 2.3                   | PLEKHA1     |
| 219155_at                                                                  | -2.0             | -7.2                  | PITPNC1     |
| 225688_s_at                                                                | -29.2            | -5.4                  | PHLDB2      |
| Wingless-type MMTV integration site family member/Hedgehog/Notch signaling |                  |                       |             |
| 229103_at                                                                  | 2.7              | 2.6                   | WNT3        |
| 224022_x_at                                                                | 2.4              | 2.4                   | WNT16       |
| 1553873_at                                                                 | 3.2              | 2.3                   | KLHL34      |
| 209815_at                                                                  | 3.2              | -2.7                  | PTCH1       |
| 226666_at                                                                  | 4.7              | -2.3                  | DAAM1       |
| 223709_s_at                                                                | -2.6             | 2.5                   | WNT10A      |
| 212611_at                                                                  | -2.9             | 2.1                   | DTX4        |
| 227336_at                                                                  | -2.2             | 5.4                   | DTX1        |
| 203987_at                                                                  | -6.0             | -2.1                  | FZD6        |
| Signaling lymphocytic activation molecule signaling                        |                  |                       |             |
| 211192_s_at                                                                | 2.6              | 2.8                   | CD84        |
| 222838_at                                                                  | 19.9             | -2.2                  | SLAMF7      |
| Transcription factors                                                      |                  |                       |             |
| 215767_at                                                                  | 17.2             | 2.0                   | ZNF804A     |
| 225802_at                                                                  | 3.9              | 2.6                   | TOP1MT      |
| 228698_at                                                                  | 36.3             | 11.2                  | SOX7        |
| 219387_at                                                                  | 4.7              | 2.4                   | CCDC88A     |
| 228994_at                                                                  | 3.9              | 2.8                   | CCDC24      |
| 219221_at                                                                  | 6.5              | -3.0                  | ZBTB38      |
| 219836_at                                                                  | 9.9              | -14.0                 | ZBED2       |
| 204529_s_at                                                                | 5.1              | -22.9                 | TOX         |
| 205255_x_at                                                                | 6.0              | -5.6                  | TCF7        |
| 228964_at                                                                  | 3.1              | -4.8                  | PRDM1       |
| 202393_s_at                                                                | 5.1              | -5.5                  | KLF10       |
| 236635_at                                                                  | -5.9             | 2.2                   | ZNF667      |
| 218793_s_at                                                                | -2.5             | 3.2                   | SCML1       |
| 203140_at                                                                  | -4.4             | 2.4                   | BCL6        |
| 208703_s_at                                                                | -8.8             | 10.0                  | APLP2       |
| 210829_s_at                                                                | -4.9             | -2.1                  | SSBP2       |
| 204900_x_at                                                                | -2.5             | -3.4                  | SAP30       |
| 219396_s_at                                                                | -7.5             | -4.8                  | NEIL1       |
| 1555420_a_at                                                               | -5.4             | -4.6                  | KLF7        |
| 211597_s_at                                                                | -55.2            | -224.2                | HOPX        |
| 236442_at                                                                  | -3.4             | -2.7                  | DPF3        |
| 230807_at                                                                  | -5.9             | -3.9                  | CCDC151     |
| Cell adhesion molecules                                                    |                  |                       |             |
| 221004_s_at                                                                | 2.6              | 2.2                   | ITM2C       |
| 209498_at                                                                  | 18.3             | 5.0                   | CEACAM1     |
| 212813_at                                                                  | 3.2              | 2.2                   | JAM3        |
| 206869_at                                                                  | 7.7              | -9.8                  | CHAD        |

Table S1. Cont.

| Probe set                                                | IgM memory/naive | IgM memory/IgG memory | Gene symbol     |
|----------------------------------------------------------|------------------|-----------------------|-----------------|
| 208949_s_at                                              | 4.8              | -38.3                 | LGALS3          |
| 201506_at                                                | 5.9              | -2.5                  | TGFB1           |
| 219737_s_at                                              | -7.0             | 7.2                   | PCDH9           |
| 1555691_a_at                                             | -2.1             | 4.5                   | KLRC4           |
| 200606_at                                                | -69.0            | 4.0                   | DSP             |
| 204591_at                                                | -2.9             | 2.9                   | CHL1            |
| 201005_at                                                | -31.9            | -3.7                  | CD9             |
| 215145_s_at                                              | -17.5            | -9.7                  | CNTNAP2         |
| 225673_at                                                | -2.9             | -3.3                  | MYADM           |
| Cytokines, hormones, growth factors, and their receptors |                  |                       |                 |
| 206170_at                                                | 4.5              | 2.8                   | ADRB2           |
| 209392_at                                                | 41.3             | 11.3                  | ENPP2           |
| 217853_at                                                | 4.4              | 2.8                   | TNS3            |
| 205207_at                                                | 2.2              | 12.6                  | IL-6            |
| 204912_at                                                | 4.1              | 2.1                   | IL-10RA         |
| 242903_at                                                | 2.5              | 2.3                   | IFNGR1          |
| 200678_x_at                                              | 3.4              | 2.1                   | GRN             |
| 205225_at                                                | 4.4              | 2.9                   | ESR1            |
| 206978_at                                                | 41.1             | 2.9                   | CCR2            |
| 205098_at                                                | 5.2              | -16.0                 | CCR1            |
| 226333_at                                                | 3.4              | -35.5                 | IL-6R           |
| 216176_at                                                | 2.5              | -8.5                  | HCRP1           |
| 209499_x_at                                              | -2.4             | 4.0                   | TNFSF12-TNFSF13 |
| 205114_s_at                                              | -7.8             | 4.4                   | CCL3            |
| 201161_s_at                                              | -10.3            | 3.5                   | CSDA            |
| 204897_at                                                | -2.2             | -2.1                  | PTGER4          |
| 203233_at                                                | -105.0           | -4.5                  | IL-4R           |
| 211612_s_at                                              | -6.3             | -7.4                  | IL-13RA1        |
| 216615_s_at                                              | -2.1             | -7.6                  | HTR3A           |
| 209524_at                                                | -4.0             | -2.3                  | HDGFRP3         |
| 228948_at                                                | -5.0             | -106.7                | EPHA4           |
| Igs                                                      |                  |                       |                 |
| 215118_s_at                                              | 13.3             | -13.9                 | IGHG/IGHM       |
| 228518_at                                                | 7.7              | -2.1                  | IGHG/IGHM       |
| 217022_s_at                                              | 15.0             | -7.4                  | IGHA1/IGHA2     |
| 216491_x_at                                              | -2.4             | 2.7                   | IGHM            |
| 213674_x_at                                              | -3.6             | 32.6                  | IGHD            |
| 1558438_a_at                                             | -2.4             | -13.3                 | IGHE            |
| Channels and transporters                                |                  |                       |                 |
| 230748_at                                                | 5.1              | -2.5                  | SLC16A6         |
| 205234_at                                                | 9.9              | 4.8                   | SLC16A4         |
| 212192_at                                                | 2.9              | -2.9                  | KCTD12          |
| 205262_at                                                | 2.0              | -2.3                  | KCNH2           |
| 39248_at                                                 | 3.2              | -9.1                  | AQP3            |
| 214595_at                                                | -34.5            | 3.0                   | KCNG1           |
| 202124_s_at                                              | -4.1             | -2.4                  | TRAK2           |
| 210432_s_at                                              | -43.1            | -16.4                 | SCN3A           |
| 219287_at                                                | -2.4             | -2.1                  | KCNMB4          |
| 223727_at                                                | -3.5             | -2.5                  | KCNIP2          |
| 1552742_at                                               | -23.8            | -16.6                 | KCNH8           |
| Metabolism                                               |                  |                       |                 |
| 237180_at                                                | 2.1              | 2.4                   | PSME4           |
| 224839_s_at                                              | 3.1              | 2.2                   | GPT2            |
| 45288_at                                                 | 2.5              | 2.7                   | ABHD6           |
| 202589_at                                                | 3.8              | -9.8                  | TYMS            |
| 223062_s_at                                              | 2.6              | -2.0                  | PSAT1           |
| 32502_at                                                 | 2.4              | -3.1                  | GDPD5           |
| 223952_x_at                                              | 2.3              | -2.3                  | DHRS9           |
| 226517_at                                                | 9.6              | -2.2                  | BCAT1           |
| 218844_at                                                | 2.5              | -2.6                  | ACSF2           |
| 213725_x_at                                              | -2.4             | 2.1                   | XYLT1           |
| 225207_at                                                | -10.6            | 2.2                   | PDK4            |



**Table S2. Summary of fluorescence microscopic analysis of nuclear BACH2 expression as determined by a blinded evaluation**

| Population | Stimulus     | Cells analyzed <sup>a</sup> | Bright nuclear BACH2 <sup>a</sup> | Dim nuclear BACH2 <sup>a</sup> | Absent nuclear BACH2 <sup>a</sup> | Bright cytosolic BACH2 <sup>a</sup> | Dim cytosolic BACH2 <sup>a</sup> | Absent cytosolic BACH2 <sup>a</sup> |
|------------|--------------|-----------------------------|-----------------------------------|--------------------------------|-----------------------------------|-------------------------------------|----------------------------------|-------------------------------------|
| Naive      | None         | 80                          | 20                                | 47                             | 13                                | 17                                  | 55                               | 8                                   |
|            | 16 h anti-Ig | 109                         | 25                                | 39                             | 45                                | 50                                  | 55                               | 4                                   |
| IgM memory | None         | 40                          | 8                                 | 19                             | 12                                | 15                                  | 25                               | 0                                   |
|            | 16 h anti-Ig | 143                         | 12**                              | 54                             | 77*                               | 80                                  | 59                               | 4                                   |
| IgG memory | None         | 59                          | 11                                | 30                             | 18                                | 37                                  | 22**                             | 0*                                  |
|            | 16 h anti-Ig | 138                         | 8***                              | 48                             | 82**                              | 53                                  | 66                               | 19**                                |

Numbers are significantly different (\* $P < 0.05$ ; \*\* $P < 0.01$ ; \*\*\* $P < 0.001$ ) from the corresponding naive B-cell activation condition as calculated by Fisher's exact test.

<sup>a</sup>Total cell numbers from three donors are given; counting was performed in a blinded study (cell type and activation status masked).
